# Supplementary material for: Anti-HLA Class II Antibodies Correlate with C-Reactive Protein Levels in Patients with Rheumatoid Arthritis Associated with Interstitial Lung Disease
Source: MDPI journal article supplement (doi:10.3390/cells9030691), 2020-03-11
Supplement: s1 [file s1]

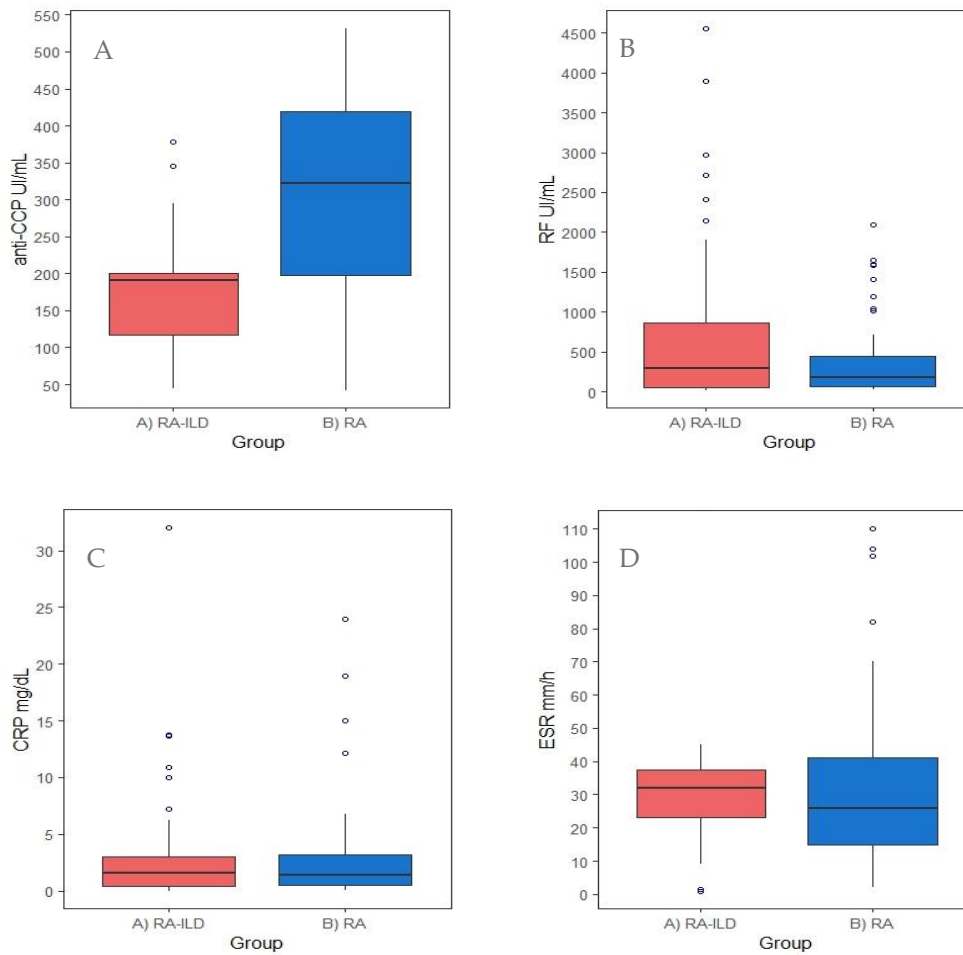

**Supplementary Figure 1.** The levels of biomarkers of the RA with or without ILD in 147 patients. The comparison between groups no statistical differences were found. (A) Levels of anti-CCP (UI/mL), (B) Levels of RF (UI/mL), (C) Levels of CRP (mg/dL) and (D) Levels of ESR (mm/h).

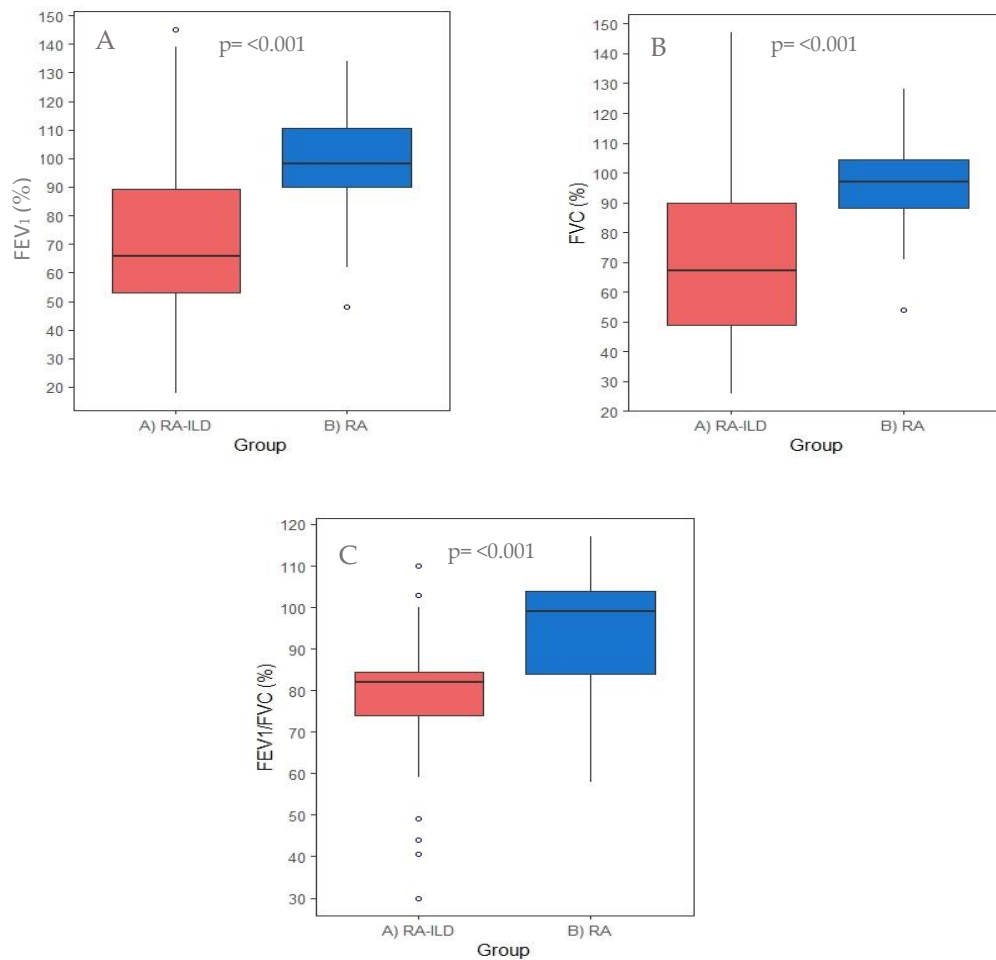

**Supplementary Figure 2.** The percentage of lung function values of the RA with and without ILD in 147 patients. The comparison between groups statistical differences were found. (A) FEV<sub>1</sub> (%): forced expiratory volume in the first second values, (B) FVC (%): forced vital capacity values and (C) FEV<sub>1</sub>/FVC (%): forced expiratory volume in the first second/forced vital capacity ratio.

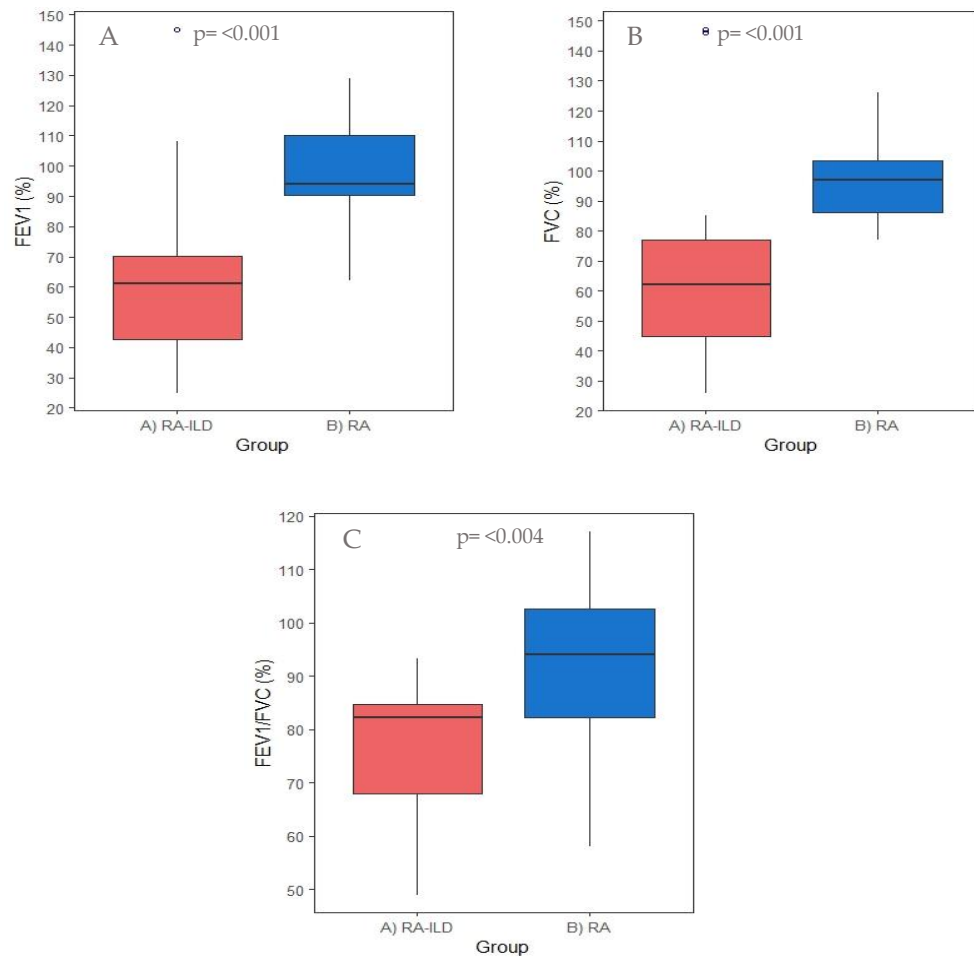

**Supplementary Figure 3.** The percentage of lung function values of the RA with and without ILD in 147 patients. The comparison between groups statistical differences were found. (A) FEV<sub>1</sub> (%): forced expiratory volume in the first second values, (B) FVC (%): forced vital capacity values and (C) FEV<sub>1</sub>/FVC (%) forced expiratory volume in the first second/forced vital capacity ratio.

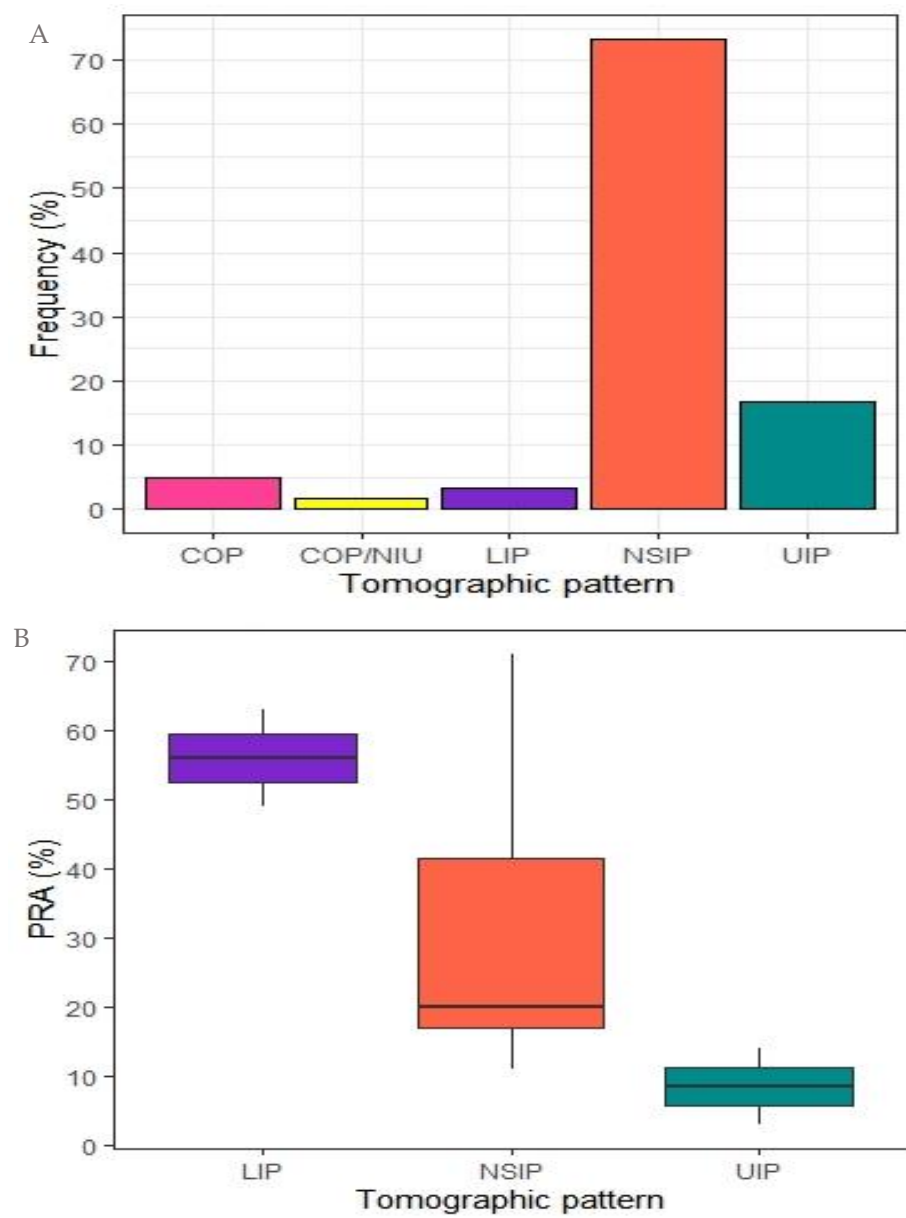

**Supplementary Figure 4.** Tomographic pattern in patients with ILD-RA. A) Tomographic patterns found in patients with ILD. B) Tomographic patterns found in patients with ILD positive for PRA

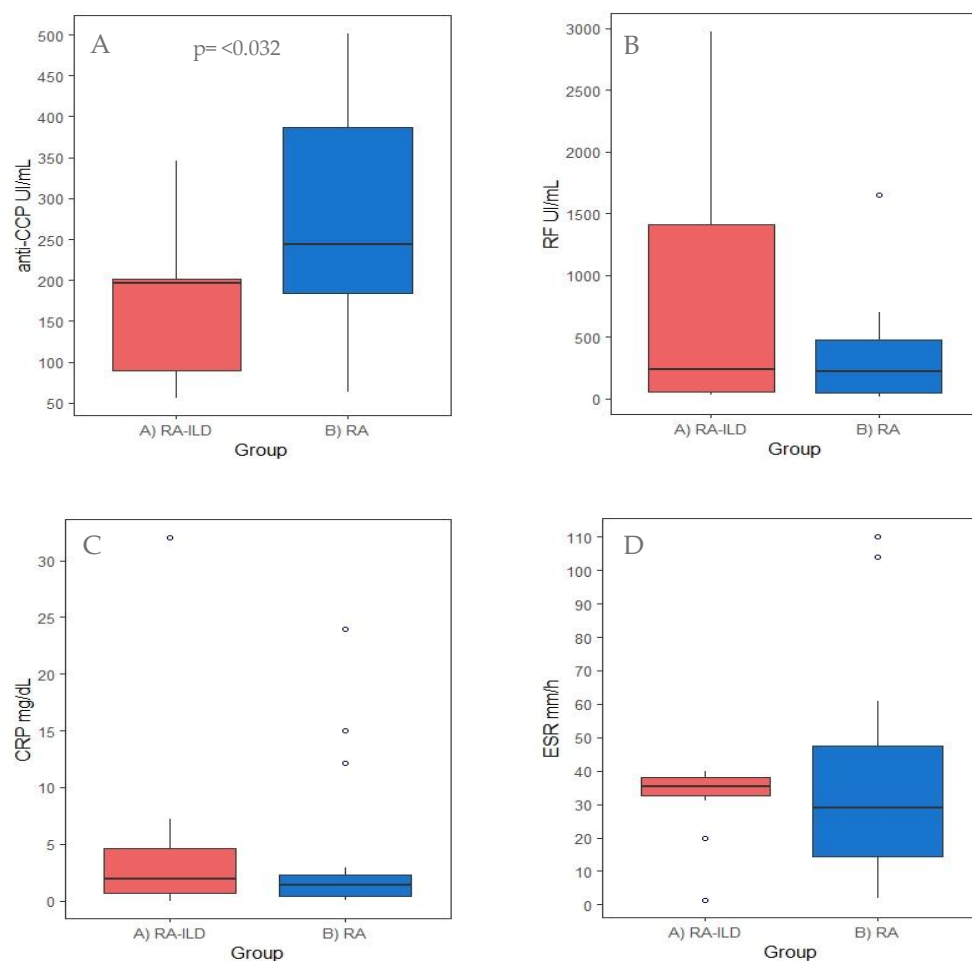

**Supplementary Figure 5.** The levels of biomarkers of the RA with or without ILD in patients PRA positive. The comparison between groups no statistical differences were found. (A) Levels of anti-CCP (UI/mL), (B) Levels of RF (UI/mL), (C) Levels of CRP (mg/dL) and (D) Levels of ESR (mm/h).
